# Supplementary material for: Analysis of P(v-a)CO2/C(a-v)O2 Ratio and Other Perfusion Markers in a Population of 98 Pediatric Patients Undergoing Cardiac Surgery
Source: Preprints.org preprint supplement (doi:10.20944/preprints202308.1985.v1), 2023-08-29
Supplement: Supplementary file 1 [file supplementary]

| Sampling times | LCOS | Mean Value  (sd)  mmol/l | P-value |
| --- | --- | --- | --- |
| Pre-CPB | Yes | 1,71 (2,89) | *0,048* |
|  | No | 1,05 (0,35) |
| Post-CPB | Yes | 2,90 (2,62) | *0,001* |
|  | No | 1,87 (0,87) |
| ICU adm. | Yes | 2,60 (2,59) | *0,026* |
|  | No | 1,91 (1,17) |
| Pre-ext. | Yes | 1,37 (0,57) | 0,234 |
|  | No | 1,68 (0,94) |
| Post-ext. | Yes | 1,54 (0,71) | 0,403 |
|  | No | 1,79 (1,10) |

**Table S-1:** correlation between serum lactate levels and LCOS development in the whole population.
